CORRECTION

# Correction: Impact of Open Data Policies on Consent to Participate in Human Subjects Research: Discrepancies between Participant Action and Reported Concerns

Jorden A. Cummings, Jessica M. Zagrodney, T. Eugene Day

The following information is missing from the Funding section: This work was supported by a Saskatchewan Health Research Foundation Establishment Grant awarded to Jorden A. Cummings, Ph.D.

## Reference

1. Cummings JA, Zagrodney JM, Day TE (2015) Impact of Open Data Policies on Consent to Participate in Human Subjects Research: Discrepancies between Participant Action and Reported Concerns. PLoS ONE 10(5): e0125208. doi: [10.1371/journal.pone.0125208](https://doi.org/10.1371/journal.pone.0125208) PMID: [25993308](https://pubmed.ncbi.nlm.nih.gov/25993308/)

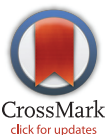

## OPEN ACCESS

**Citation:** Cummings JA, Zagrodney JM, Day TE (2015) Correction: Impact of Open Data Policies on Consent to Participate in Human Subjects Research: Discrepancies between Participant Action and Reported Concerns. PLoS ONE 10(6): e0131852. doi:10.1371/journal.pone.0131852

**Published:** June 25, 2015

**Copyright:** © 2015 Cummings et al. This is an open access article distributed under the terms of the [Creative Commons Attribution License](https://creativecommons.org/licenses/by/4.0/), which permits unrestricted use, distribution, and reproduction in any medium, provided the original author and source are credited.
